# Supplementary material
Source: PubMed Central journal article supplement (PMC6278984)
Supplement: 2018_190447-Disclosures_and_Contributions.pdf [file 2018_190447-Disclosures_and_Contributions.pdf]

Haematologica  
HAEMATOL/2018/190447  
Version 3

L-leucine increases translation of RPS14 and LARP1 in erythroblasts  
from del(5q) myelodysplastic syndrome patients

Erica Bello, Jonathan Kerry, Shalini Singh, Bon Ham Yip, Rajko Kuec,  
Sally Killick, Sophie Raynaud, Jacqueline Boulwood, and Andrea  
Pellagatti

Disclosures: None

Contributions: EB, SS, BHY, RK, SK and SR performed research; EB, JK, JB and AP performed data analysis; EB, JB and AP wrote the manuscript; JB and AP supervised the study.
